# Supplementary material for: Open frameworks in the NaxMny(P2O7)mFn fluoro-pyrophosphates system
Source: Royal Society of Chemistry journal article supplement (doi:10.1039/d4dt03027c), 2025-01-01
Supplement: d4dt03027c1.pdf [file d4dt03027c1.pdf]

Supporting Information for:

## Open frameworks in the $\text{Na}_x\text{Mn}_y(\text{P}_2\text{O}_7)_m\text{F}_n$ fluoro-pyrophosphates system

Feifan Li,<sup>a</sup> Yaping Li,<sup>b</sup> Victor Duffort,<sup>c</sup> Olivier Mentré,<sup>c</sup> Claire Minaud,<sup>c</sup> Qingqing Huang,<sup>b</sup> Xiedong Cheng,<sup>a</sup> Rui Cui,<sup>d</sup> Minfeng Lü,<sup>a,\*</sup>

<sup>a</sup> School of Materials Science and Engineering, Jiangsu University of Science and Technology, Zhenjiang 212100, Jiangsu, China

<sup>b</sup> School of Environmental & Chemical Engineering, Jiangsu University of Science and Technology, Zhenjiang 212003, Jiangsu, China

<sup>c</sup> Univ. Lille, CNRS, Centrale Lille, ENSCL, Univ. Artois, UMR 8181 UCCS - Unité de Catalyse et Chimie du Solide, F-59000 Lille, France.

<sup>d</sup> School of Metallurgy and Materials Engineering, Jiangsu University of Science and Technology, Zhangjiagang 215600, Jiangsu, China

\*Corresponding Author:

Professor Minfeng Lü

Tel: +86-511-84401181; E-mail: m.f.lv@hotmail.com (M.F.Lu)

Figure S1. The corresponding EDX spectra for  $\text{Na}_{5.5}\text{Mn}_{1.5}(\text{P}_2\text{O}_7)_2\text{F}_{0.5}$ .

Figure S2. The corresponding EDX spectra for  $\text{Na}_7\text{Mn}_{0.75}(\text{P}_2\text{O}_7)_2\text{F}_2$ .

Figure S3. The corresponding EDX spectra for  $\text{Na}_9\text{Mn}_3(\text{P}_2\text{O}_7)_4\text{F}$ .

Figure S4. Infrared spectra of  $\text{Na}_9\text{Mn}_3(\text{P}_2\text{O}_7)_4\text{F}$ .

Figure S5. XPS spectra of P 2p region for  $\text{Na}_9\text{Mn}_3(\text{P}_2\text{O}_7)_4\text{F}$ .

Figure S6. TGA diagram for  $\text{Na}_9\text{Mn}_3(\text{P}_2\text{O}_7)_4\text{F}$ .

Figure S7. PXRD patterns annealing at 500°C (blue) and 450°C (red) in Argon, compared with experimental PXRD patterns (green) for  $\text{Na}_9\text{Mn}_3(\text{P}_2\text{O}_7)_4\text{F}$ .

Figure S8. Surrounding coordination environment (dotted-line linkage) of the  $[\text{Na}_{0.5}\text{Mn}_{1.5}(\text{P}_2\text{O}_7)_2\text{F}_{0.5}]^{5-}$  group in  $\text{Na}_{5.5}\text{Mn}_{1.5}(\text{P}_2\text{O}_7)_2\text{F}_{0.5}$ .

Figure S9. Surrounding coordination environment of the  $[\text{Mn}_{0.75}(\text{P}_2\text{O}_7)_2\text{F}_2]^{7-}$  group with ORTEP (80% possibility ellipsoids) drawings in  $\text{Na}_7\text{Mn}_{0.75}(\text{P}_2\text{O}_7)_2\text{F}_2$ .

Figure S10. View of the structure of  $\text{Na}_9\text{Mn}_3(\text{P}_2\text{O}_7)_4\text{F}$  along the  $b$  axis (a) with detailed local coordination environment of the (b)  $[\text{Mn}^{1/2\text{III}}\text{O}_6]^{9-}$ , (c)  $[\text{Mn}^{3\text{II}}\text{O}_5]^{7-}$  and (d)  $\text{PO}_4$  polyhedra

Figure S11. Inverse magnetic susceptibility  $1/\chi$  of  $\text{Na}_9\text{Mn}_3(\text{P}_2\text{O}_7)_4\text{F}$  as a function of temperature.

Figure S12.  $\chi T$  vs.  $T$  curve at 0.1 T after cooling in field.

Figure S13: Representation of the diffusion pathways of  $\text{Na}^+$  ions calculated using BVEL and displayed with an energy threshold of 1.6 eV.

Table S1. BVS of  $\text{Na}_{5.5}\text{Mn}_{1.5}(\text{P}_2\text{O}_7)_2\text{F}_{0.5}$ ,  $\text{Na}_7\text{Mn}_{0.75}(\text{P}_2\text{O}_7)_2\text{F}_2$ ,  $\text{Na}_9\text{Mn}_3(\text{P}_2\text{O}_7)_4\text{F}$ .

Table S2. Fractional atomic coordinates and isotropic or equivalent isotropic displacement parameters of  $\text{Na}_{5.5}\text{Mn}_{1.5}(\text{P}_2\text{O}_7)_2\text{F}_{0.5}$ .

Table S3. Harmonic displacement parameters obtained for the compound  $\text{Na}_{5.5}\text{Mn}_{1.5}(\text{P}_2\text{O}_7)_2\text{F}_{0.5}$ .

Table S4. Bond lengths (Å) and Bond angles (degrees) of  $\text{Na}_{5.5}\text{Mn}_{1.5}(\text{P}_2\text{O}_7)_2\text{F}_{0.5}$ .

Table S5. Fractional atomic coordinates and isotropic or equivalent isotropic displacement parameters of  $\text{Na}_7\text{Mn}_{0.75}(\text{P}_2\text{O}_7)_2\text{F}_2$ .

Table S6. Harmonic displacement parameters obtained for the compound  $\text{Na}_7\text{Mn}_{0.75}(\text{P}_2\text{O}_7)_2\text{F}_2$ .

Table S7. Bond lengths (Å) and Bond angles (degrees) of  $\text{Na}_7\text{Mn}_{0.75}(\text{P}_2\text{O}_7)_2\text{F}_2$ .

Table S8. Fractional atomic coordinates and isotropic or equivalent isotropic displacement parameters of  $\text{Na}_9\text{Mn}_3(\text{P}_2\text{O}_7)_4\text{F}$ .

Table S9. Harmonic displacement parameters obtained for the compound  $\text{Na}_9\text{Mn}_3(\text{P}_2\text{O}_7)_4\text{F}$ .

Table S10. Bond lengths (Å) and Bond angles (degrees) of  $\text{Na}_9\text{Mn}_3(\text{P}_2\text{O}_7)_4\text{F}$ .

Table S11. Geometrical Parameters Associated with the M- O•••O -M Super-Supereexchange Paths of  $\text{Na}_9\text{Mn}_3(\text{P}_2\text{O}_7)_4\text{F}$ .

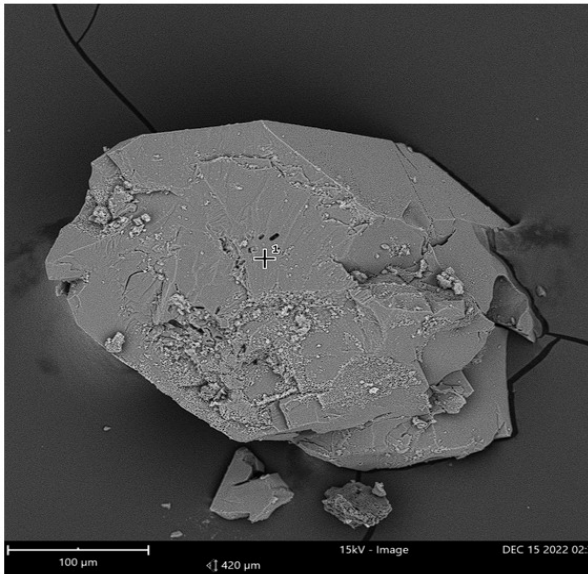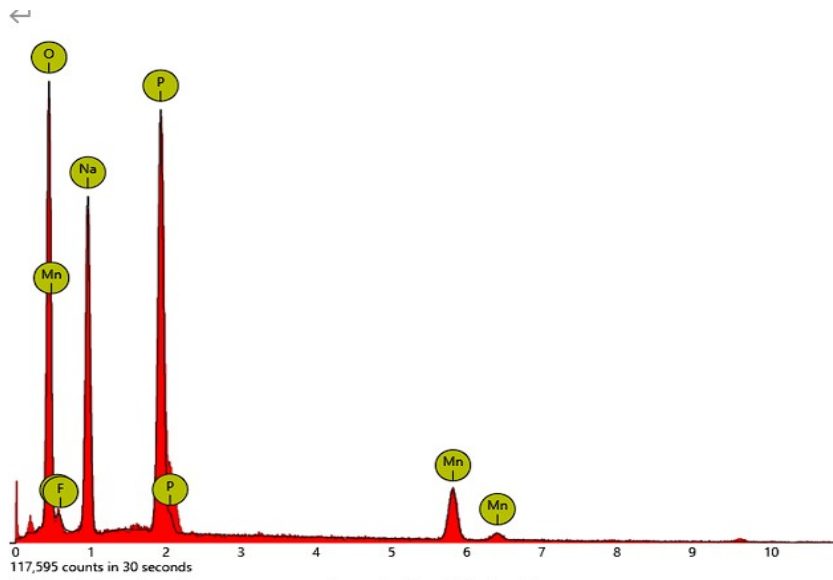

Figure S1. The corresponding EDX spectra for  $\text{Na}_{5.5}\text{Mn}_{1.5}(\text{P}_2\text{O}_7)_2\text{F}_{0.5}$ .

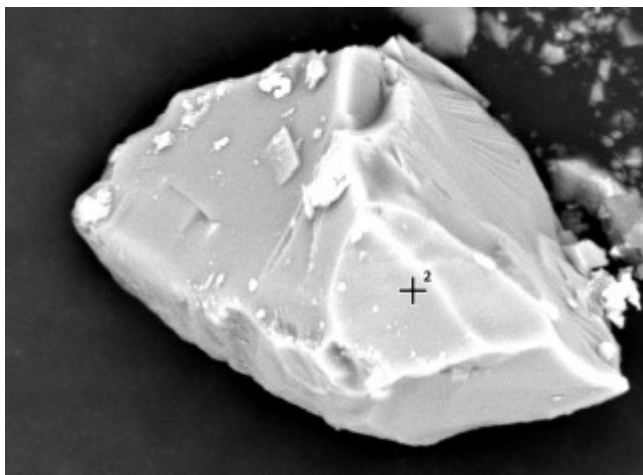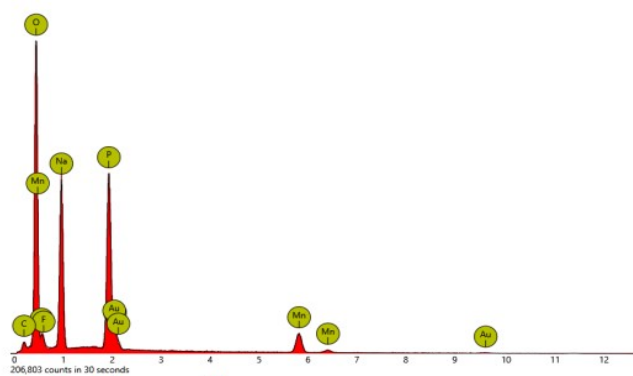

Figure S2. The corresponding EDX spectra for  $\text{Na}_7\text{Mn}_{0.75}(\text{P}_2\text{O}_7)_2\text{F}_2$ .

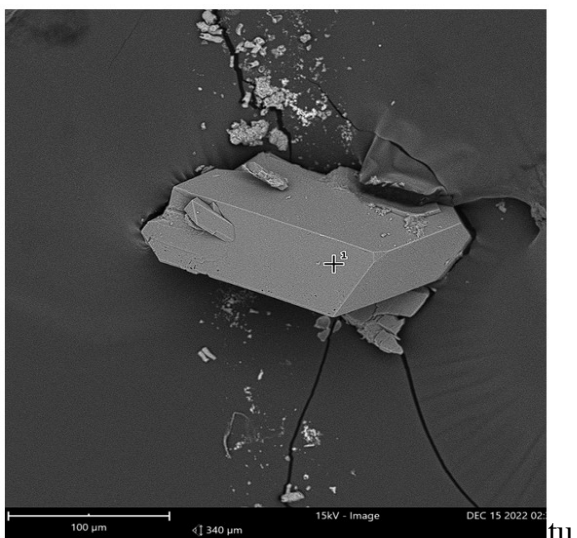

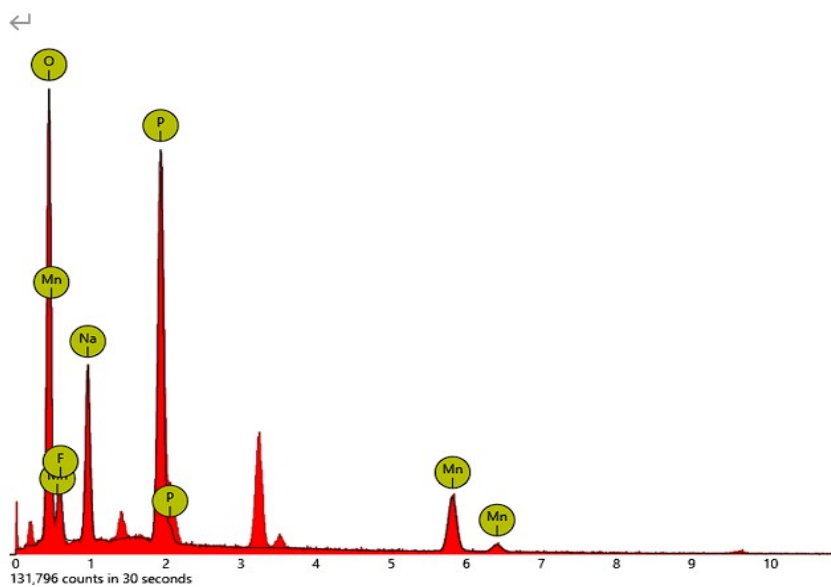

Figure S3. The corresponding EDX spectra for  $\text{Na}_9\text{Mn}_3(\text{P}_2\text{O}_7)_4\text{F}$ .

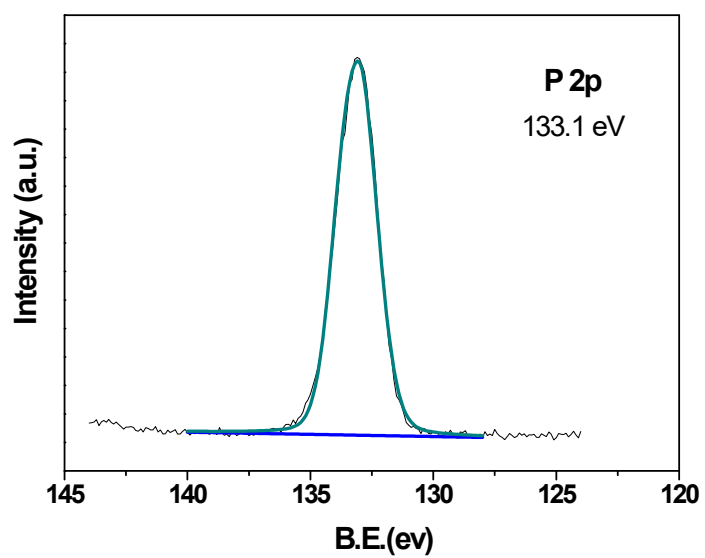

Figure S4. XPS spectra of P 2p region for  $\text{Na}_9\text{Mn}_3(\text{P}_2\text{O}_7)_4\text{F}$ .

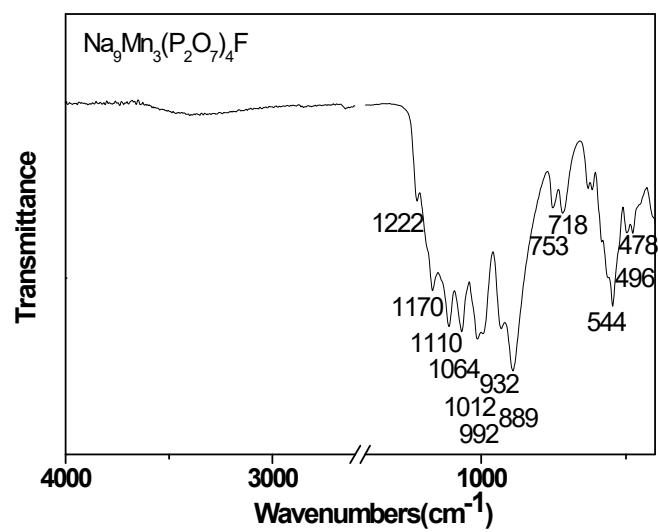

Figure S5. Infrared spectra of Na<sub>9</sub>Mn<sub>3</sub>(P<sub>2</sub>O<sub>7</sub>)<sub>4</sub>F.

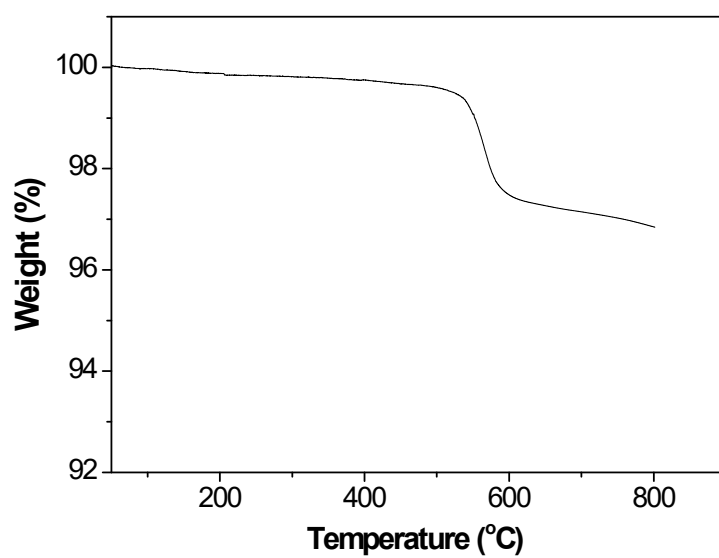

Figure S6. TGA diagram for Na<sub>9</sub>Mn<sub>3</sub>(P<sub>2</sub>O<sub>7</sub>)<sub>4</sub>F.

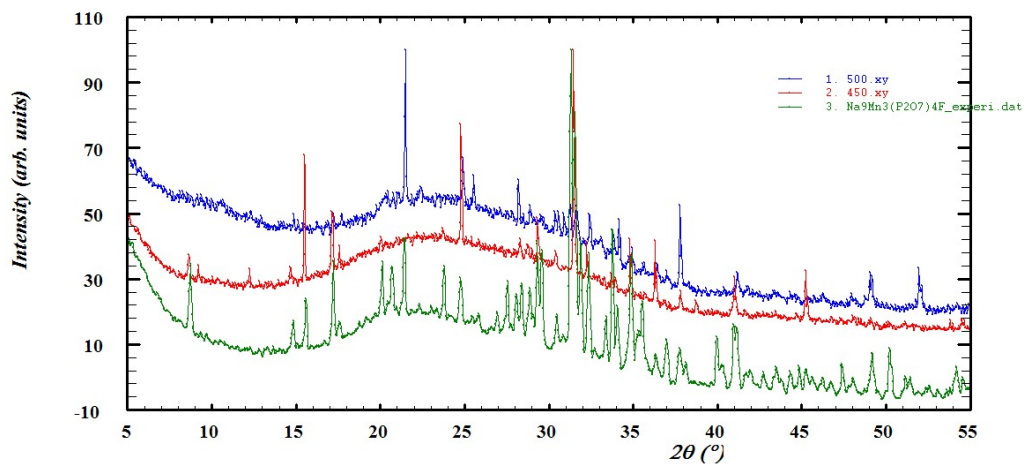

Figure S7. PXR D patterns annealing at 500°C (blue) and 450°C (red) in Argon, compared with experimental PXR D patterns ( green )for  $\text{Na}_9\text{Mn}_3(\text{P}_2\text{O}_7)_4\text{F}$  .

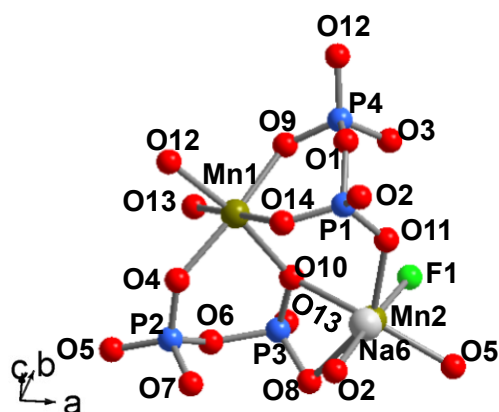

Figure S8. Surrounding coordination environment (dotted-line linkage) of the  $[\text{Na}_{0.5}\text{Mn}_{1.5}(\text{P}_2\text{O}_7)_2\text{F}_{0.5}]^{5-}$  group in  $\text{Na}_{5.5}\text{Mn}_{1.5}(\text{P}_2\text{O}_7)_2\text{F}_{0.5}$ .

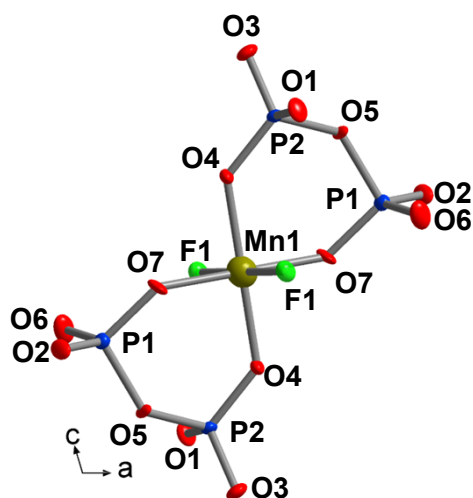

Figure S9. Surrounding coordination environment of the  $[\text{Mn}_{0.75}(\text{P}_2\text{O}_7)_2\text{F}_2]^{7-}$  group with ORTEP (80% possibility ellipsoids) drawings in  $\text{Na}_7\text{Mn}_{0.75}(\text{P}_2\text{O}_7)_2\text{F}_2$ .

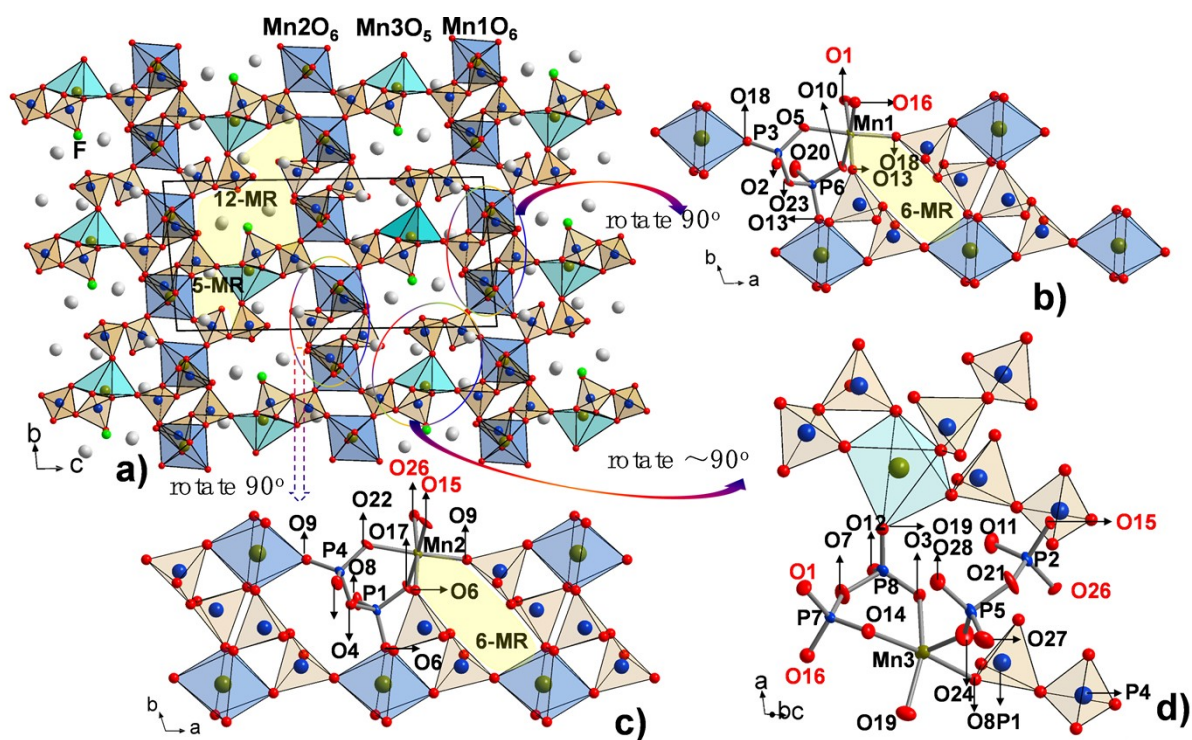

Figure S10. View of the structure of  $\text{Na}_9\text{Mn}_3(\text{P}_2\text{O}_7)_4\text{F}$  along the  $b$  axis (a) with detailed local coordination environment of the (b)  $[\text{Mn}_{1/2}^{\text{III}}\text{O}_6]^{9-}$ , (c)  $[\text{Mn}_3^{\text{II}}\text{O}_5]^{7-}$  and (d)  $\text{PO}_4$  polyhedra



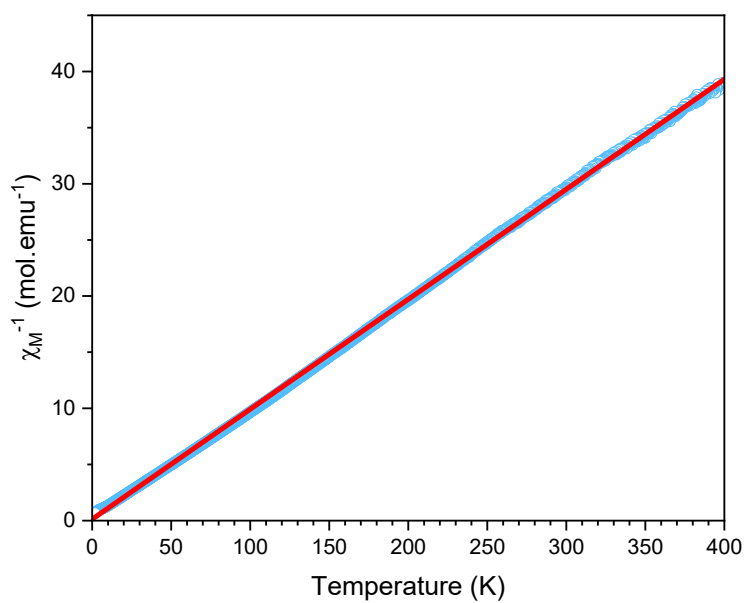

Figure S11. Inverse magnetic susceptibility  $1/\chi$  of  $\text{Na}_9\text{Mn}_3(\text{P}_2\text{O}_7)_4\text{F}$  as a function of temperature. The red solid lines denote the fits to the Curie-Weiss law.

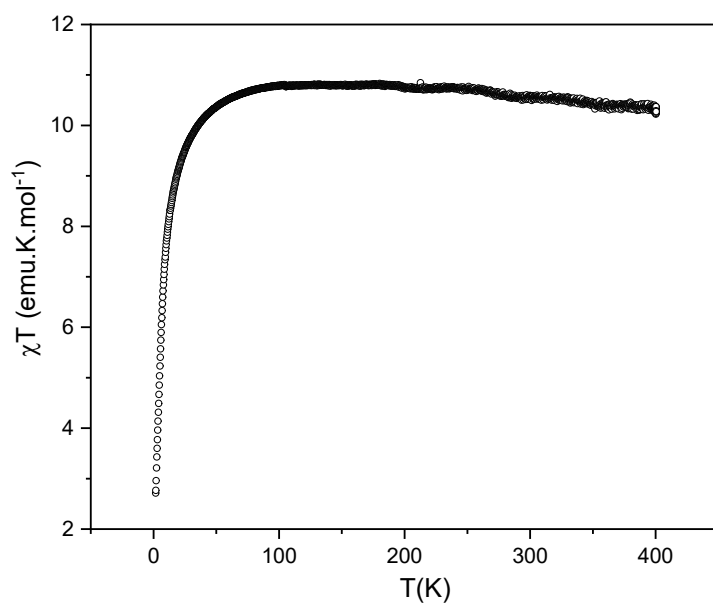

Figure S12.  $\chi T$  vs.  $T$  curve at 0.1 T after cooling in field.

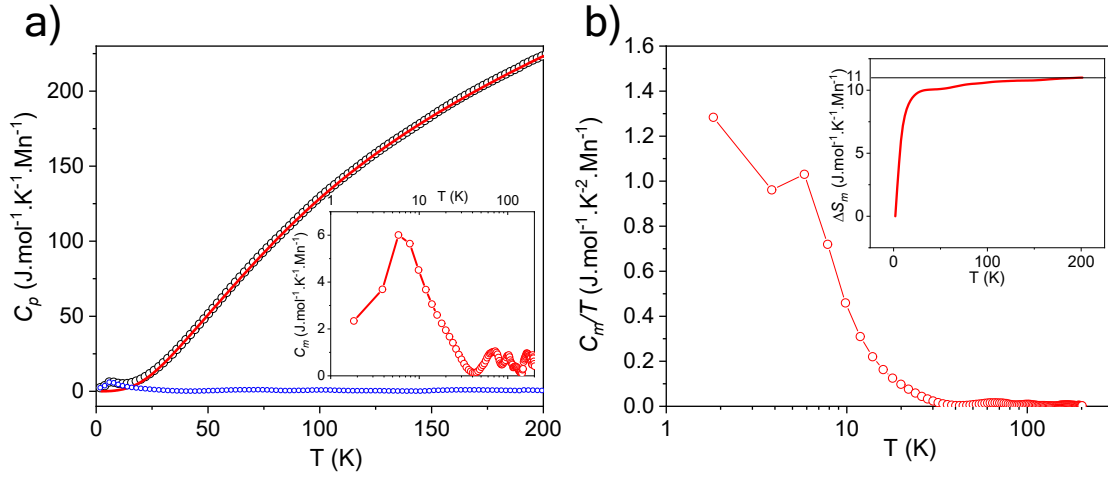

Figure S13. (a) Temperature dependence of total specific heat  $C_p(T)$  with magnetic specific heat  $C_m(T)$  (blue circles) and lattice contribution  $C_{lat}(T)$  (red solid line). The inset shows  $C_m(T)$  vs temperature. (b) Temperature dependence of  $C_m(T)/T$  and calculated magnetic entropy  $\Delta S_m$  (inset).

To evaluate the magnetic specific heat  $C_m$ , the lattice heat capacity was estimated as a combination of one Debye model and two Einstein models:<sup>1</sup>

$$C_{lattice} = C_{Debye} + C_{Einstein}^i = c_o \left[ 9R \left( \frac{T}{\theta_D} \right)^3 \int_0^{\theta_D/T} \frac{x^2 e^x}{(e^x - 1)^2} dx \right] + 3R \sum_{i=1}^2 c_i \left[ \left( \frac{\theta_E^i}{T} \right)^2 \frac{e^{\theta_E^i/T}}{(e^{\theta_E^i/T} - 1)^2} \right].$$

where  $R$  is the universal gas constant; and  $\theta_D$  and  $\theta_E^i$  are the Debye characteristic temperature and Einstein characteristic temperature, respectively; and  $c_o$  and  $c_i$  are the oscillator strengths for the Debye term and Einstein term, respectively. For fittings, the sum of the weighting factors for the total number of atoms per Mn formula unit ( $c_o + c_1 + c_2 = 49/3$ ) is fixed. The fitting parameters yield  $\theta_D = 1402(10)$  K,  $\theta_E^1 = 473(5)$  K,  $\theta_E^2 = 207(6)$  K,  $c_o = 7.2(3)$ ,  $c_1 = 6.1(2)$ , and  $c_2 = 3.1(2)$  in the high-temperature range between 35 K and 200 K. As shown in Figure S13a, the calculated lattice specific heat  $C_{latt}$  reproduces the high-T behaviour of the total heat capacity  $C_p$  well.

The magnetic specific heat  $C_m$  was subtracted  $C_{latt}$  from  $C_p$ , as displayed in the inset of Figure S13a.  $C_m(T)$  clearly increases with decreasing temperature below 30 K and shows a broad peak at  $T_N = 5.0$  K. By integrating  $C_m/T(T)$  against temperature (Figure S13b), the magnetic entropy change  $\Delta S_m$  is estimated, as shown in the inset of Figure S13b. The saturation of the magnetic entropy is calculated to be  $11.0 \text{ J} \cdot \text{mol}^{-1} \cdot \text{K}^{-1}$ , which is lower than the theoretical expected value  $[2 \times R \ln(2S_1 + 1) + R \ln(2S_2 + 1)]/3 = 13.88 \text{ J} \cdot \text{mol}^{-1} \cdot \text{K}^{-1}$  for  $S_1 = 2$ ,  $S_2 = 5/2$ . Above 30

K,  $\Delta S_m$  is nearly temperature independent. However, below 30 K, approximately 76% of  $\Delta S_m$  is released, accompanied by long-range ordering at  $T_N$ .

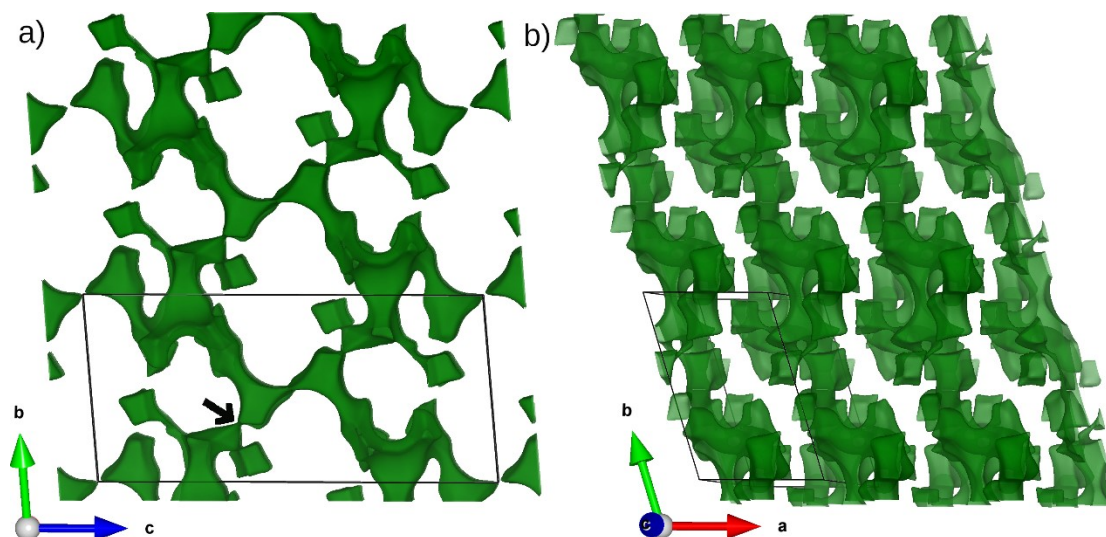

Figure S14: Representation of the diffusion pathways of  $\text{Na}^+$  ions calculated using BVEL and displayed with an energy threshold of 1.6 eV. All atoms have been omitted to emphasize a) the continuous diffusion pathway along the  $b$  direction, with the tighter jump indicated by a black arrow and b) the absence of continuous path along the  $a$  axis.

**Table S1.** BVS of  $\text{Na}_{5.5}\text{Mn}_{1.5}(\text{P}_2\text{O}_7)_2\text{F}_{0.5}$ ,  $\text{Na}_7\text{Mn}_{0.75}(\text{P}_2\text{O}_7)_2\text{F}_2$ ,  $\text{Na}_9\text{Mn}_3(\text{P}_2\text{O}_7)_4\text{F}$ .

| $\text{Na}_{5.5}\text{Mn}_{1.5}(\text{P}_2\text{O}_7)_2\text{F}_{0.5}$ |                   |                   |                  | $\text{Na}_7\text{Mn}_{0.75}(\text{P}_2\text{O}_7)_2\text{F}_2$ |                   |                   |                  | $\text{Na}_9\text{Mn}_3(\text{P}_2\text{O}_7)_4\text{F}$ |                   |                   |                  |
|------------------------------------------------------------------------|-------------------|-------------------|------------------|-----------------------------------------------------------------|-------------------|-------------------|------------------|----------------------------------------------------------|-------------------|-------------------|------------------|
| Atom                                                                   | $V_{\text{Na}^*}$ | $V_{\text{Mn}^*}$ | $V_{\text{P}^*}$ | Atom                                                            | $V_{\text{Na}^*}$ | $V_{\text{Mn}^*}$ | $V_{\text{P}^*}$ | Atom                                                     | $V_{\text{Na}^*}$ | $V_{\text{Mn}^*}$ | $V_{\text{P}^*}$ |
| Na(1)                                                                  | 1.05(1)           |                   |                  | Na(1)                                                           | 1.14(1)           |                   |                  | Na(1)                                                    | 0.88(1)           |                   |                  |
| Na(2)                                                                  | 1.17(1)           |                   |                  | Na(2)                                                           | 1.04(1)           |                   |                  | Na(2)                                                    | 1.04(1)           |                   |                  |
| Na(3)                                                                  | 1.18(1)           |                   |                  | Na(3)                                                           | 1.01(1)           |                   |                  | Na(3)                                                    | 1.16(1)           |                   |                  |
| Na(4)                                                                  | 0.95(1)           |                   |                  | Na(4)                                                           | 1.16(1)           |                   |                  | Na(4)                                                    | 0.74(1)           |                   |                  |
| Na(5)                                                                  | 0.83(1)           |                   |                  | Mn(1)                                                           |                   | 4.06(2)           |                  | Na(5)                                                    | 1.15(1)           |                   |                  |
| Mn(1)                                                                  |                   | 2.06(1)           |                  | P(1)                                                            |                   |                   | 4.95(3)          | Na(6)                                                    | 1.17(1)           |                   |                  |
| Na(6)                                                                  | 1.46(1)           |                   |                  | P(2)                                                            |                   |                   | 4.97(3)          | Na(7)                                                    | 1.27(1)           |                   |                  |
| Mn(2)                                                                  |                   | 1.28(1)           |                  |                                                                 |                   |                   |                  | Na(8)                                                    | 0.77(1)           |                   |                  |
| P(1)                                                                   |                   |                   | 4.98(4)          |                                                                 |                   |                   |                  | Na(9)                                                    | 1.10(1)           |                   |                  |
| P(2)                                                                   |                   |                   | 4.94(4)          |                                                                 |                   |                   |                  | Mn(1)                                                    |                   | 2.93(1)           |                  |
| P(3)                                                                   |                   |                   | 4.98(4)          |                                                                 |                   |                   |                  | Mn(2)                                                    |                   | 2.97(1)           |                  |
| P(4)                                                                   |                   |                   | 4.96(4)          |                                                                 |                   |                   |                  | Mn(3)                                                    |                   | 1.67(1)           |                  |
|                                                                        |                   |                   |                  |                                                                 |                   |                   |                  | P(1)                                                     |                   |                   | 5.02(3)          |
|                                                                        |                   |                   |                  |                                                                 |                   |                   |                  | P(2)                                                     |                   |                   | 5.02(3)          |
|                                                                        |                   |                   |                  |                                                                 |                   |                   |                  | P(3)                                                     |                   |                   | 4.97(3)          |
|                                                                        |                   |                   |                  |                                                                 |                   |                   |                  | P(4)                                                     |                   |                   | 5.01(3)          |

|       |                 |                 |      |                 |                 | P(5)  | 5.00(3)         |                 |
|-------|-----------------|-----------------|------|-----------------|-----------------|-------|-----------------|-----------------|
|       |                 |                 |      |                 |                 | P(6)  | 5.01(3)         |                 |
|       |                 |                 |      |                 |                 | P(7)  | 5.04(3)         |                 |
|       |                 |                 |      |                 |                 | P(8)  | 5.01(3)         |                 |
| Atom  | V <sub>F*</sub> | V <sub>O*</sub> | Atom | V <sub>F*</sub> | V <sub>O*</sub> | Atom  | V <sub>F*</sub> | V <sub>O*</sub> |
| F(1)  | -0.78(1)        |                 | F(1) | -1.20(1)        |                 | F(1)  | -0.81(1)        |                 |
| O(1)  |                 | -2.07(2)        | O(1) |                 | -2.14(2)        | O(1)  |                 | -1.97(2)        |
| O(2)  |                 | -2.04(2)        | O(2) |                 | -1.98(2)        | O(2)  |                 | -2.10(2)        |
| O(3)  |                 | -2.10(2)        | O(3) |                 | -2.11(2)        | O(3)  |                 | -1.97(2)        |
| O(4)  |                 | -1.97(3)        | O(4) |                 | -1.97(1)        | O(4)  |                 | -2.14(2)        |
| O(5)  |                 | -1.92(2)        | O(5) |                 | -1.99(2)        | O(5)  |                 | -1.94(1)        |
| O(6)  |                 | -2.21(2)        | O(6) |                 | -1.92(2)        | O(6)  |                 | -2.03(2)        |
| O(7)  |                 | -1.93(2)        | O(7) |                 | -1.97(2)        | O(7)  |                 | -2.21(2)        |
| O(8)  |                 | -1.86(2)        |      |                 |                 | O(8)  |                 | -1.94(2)        |
| O(9)  |                 | -2.01(2)        |      |                 |                 | O(9)  |                 | -2.00(2)        |
| O(10) |                 | -2.00(2)        |      |                 |                 | O(10) |                 | -2.16(1)        |
| O(11) |                 | -2.05(2)        |      |                 |                 | O(11) |                 | -1.98(2)        |
| O(12) |                 | -2.02(2)        |      |                 |                 | O(12) |                 | -2.13(2)        |
| O(13) |                 | -1.97(2)        |      |                 |                 | O(13) |                 | -1.98(2)        |
| O(14) |                 | -1.85(2)        |      |                 |                 | O(14) |                 | -1.91(2)        |
|       |                 |                 |      |                 |                 | O(15) |                 | -2.10(1)        |
|       |                 |                 |      |                 |                 | O(16) |                 | -2.04(1)        |
|       |                 |                 |      |                 |                 | O(17) |                 | -2.15(1)        |
|       |                 |                 |      |                 |                 | O(18) |                 | -1.97(2)        |
|       |                 |                 |      |                 |                 | O(19) |                 | -1.87(1)        |
|       |                 |                 |      |                 |                 | O(20) |                 | -1.90(2)        |
|       |                 |                 |      |                 |                 | O(21) |                 | -2.13(2)        |
|       |                 |                 |      |                 |                 | O(22) |                 | -1.97(1)        |
|       |                 |                 |      |                 |                 | O(23) |                 | -2.15(2)        |
|       |                 |                 |      |                 |                 | O(24) |                 | -1.89(2)        |
|       |                 |                 |      |                 |                 | O(25) |                 | -2.11(2)        |
|       |                 |                 |      |                 |                 | O(26) |                 | -1.99(2)        |
|       |                 |                 |      |                 |                 | O(27) |                 | -1.96(2)        |
|       |                 |                 |      |                 |                 | O(28) |                 | -1.91(2)        |

\* (R, b) parameters being for Na<sup>+</sup>-O (1.803, 0.37), Na<sup>+</sup>-F (1.677, 0.37), Mn<sup>2+</sup>-O (1.765, 0.37), Mn<sup>2+</sup>-F (1.698, 0.37), Mn<sup>3+</sup>-O (1.732, 0.37), Mn<sup>3+</sup>-F (1.66, 0.37), Mn<sup>4+</sup>-O (1.753, 0.37), Mn<sup>4+</sup>-F (1.71, 0.37), P<sup>5+</sup>-O (1.617, 0.37)

**Table S2.** Fractional atomic coordinates and isotropic or equivalent isotropic displacement parameters of Na<sub>5.5</sub>Mn<sub>1.5</sub>(P<sub>2</sub>O<sub>7</sub>)<sub>2</sub>F<sub>0.5</sub>.

| x | y | z |
|---|---|---|
|---|---|---|

| Wyck. |    |             |             |             | Uiso*/Ueq  | Occ.<1) |
|-------|----|-------------|-------------|-------------|------------|---------|
| Na1   | 2i | 1.6277(3)   | 0.1186(3)   | 0.3664(3)   | 0.0183(12) | 1       |
| Na2   | 2i | 1.3774(3)   | 0.5504(3)   | 0.2219(3)   | 0.0163(6)  | 1       |
| Na3   | 2i | 1.2572(3)   | 0.5849(3)   | 0.5864(3)   | 0.0192(12) | 1       |
| Na4   | 2i | 1.2103(3)   | 0.9258(3)   | -0.0404(3)  | 0.0218(12) | 1       |
| Na5   | 2i | 1.1276(3)   | 1.1913(3)   | 0.2647(3)   | 0.0233(13) | 1       |
| Mn1   | 2i | 0.97176(11) | 0.65017(12) | 0.17490(11) | 0.0102(4)  | 1       |
| Na6   | 2i | 0.4925(16)  | 0.8463(15)  | 0.2942(15)  | 0.0342(7)  | 0.5     |
| Mn2   | 2i | 0.4830(7)   | 0.8221(6)   | 0.3058(6)   | 0.0342(7)  | 0.5     |
| P1    | 2i | 0.6062(2)   | 0.7911(2)   | -0.0241(2)  | 0.0123(7)  | 1       |
| P2    | 2i | 1.0449(2)   | 0.8842(2)   | 0.3310(2)   | 0.0119(7)  | 1       |
| P3    | 2i | 0.8031(2)   | 0.6918(2)   | 0.49501(19) | 0.0108(7)  | 1       |
| P4    | 2i | 0.7664(2)   | 0.4397(2)   | 0.0870(2)   | 0.0123(7)  | 1       |
| O1    | 2i | 0.6776(5)   | 0.6192(5)   | -0.0417(5)  | 0.0138(19) | 1       |
| O2    | 2i | 0.5198(6)   | 0.9072(5)   | -0.1785(5)  | 0.023(2)   | 1       |
| O3    | 2i | 1.6361(5)   | 0.3860(5)   | 0.2047(5)   | 0.019(2)   | 1       |
| O4    | 2i | 1.0585(6)   | 0.8301(6)   | 0.2002(5)   | 0.024(2)   | 1       |
| O5    | 2i | 1.2193(5)   | 0.8675(5)   | 0.3918(5)   | 0.0198(11) | 1       |
| O6    | 2i | 0.9755(5)   | 0.7501(5)   | 0.4801(5)   | 0.0130(19) | 1       |
| O7    | 2i | 0.9151(5)   | 1.0452(5)   | 0.2946(5)   | 0.023(2)   | 1       |
| O8    | 2i | 0.6513(5)   | 0.8242(5)   | 0.5093(5)   | 0.0193(11) | 1       |
| O9    | 2i | 0.9156(5)   | 0.4504(5)   | 0.1645(5)   | 0.0138(19) | 1       |
| O10   | 2i | 0.7844(5)   | 0.6697(5)   | 0.3483(5)   | 0.015(2)   | 1       |
| O11   | 2i | 1.4809(5)   | 0.7679(5)   | 0.1060(5)   | 0.017(2)   | 1       |
| O12   | 2i | 1.1754(5)   | 0.6568(5)   | 0.0118(5)   | 0.017(2)   | 1       |
| O13   | 2i | 1.1620(5)   | 0.4635(5)   | 0.3629(5)   | 0.018(2)   | 1       |
| O14   | 2i | 0.7676(5)   | 0.8273(5)   | 0.0037(5)   | 0.0147(10) | 1       |
| F1    | 2i | 1.4814(11)  | 0.5576(10)  | 0.4514(11)  | 0.039(6)   | 0.5     |

**Table S3.** Harmonic displacement parameters obtained for the compound  $\text{Na}_{5.5}\text{Mn}_{1.5}(\text{P}_2\text{O}_7)_2\text{F}_{0.5}$ .

|     | U <sub>11</sub> | U <sub>22</sub> | U <sub>33</sub> | U <sub>12</sub> | U <sub>13</sub> | U <sub>23</sub> |
|-----|-----------------|-----------------|-----------------|-----------------|-----------------|-----------------|
| Na1 | 0.0201(14)      | 0.0185(15)      | 0.0190(16)      | -0.0072(11)     | 0.0056(12)      | -0.0099(13)     |
| Na3 | 0.0180(14)      | 0.0206(16)      | 0.0170(16)      | -0.0054(11)     | 0.0000(12)      | -0.0057(13)     |
| Na4 | 0.0186(14)      | 0.0207(16)      | 0.0225(17)      | -0.0039(12)     | 0.0000(12)      | -0.0064(13)     |
| Na5 | 0.0251(15)      | 0.0200(16)      | 0.0277(18)      | -0.0086(12)     | 0.0054(13)      | -0.0119(14)     |
| Mn1 | 0.0093(5)       | 0.0111(5)       | 0.0115(6)       | -0.0042(4)      | 0.0014(4)       | -0.0054(4)      |
| P1  | 0.0091(8)       | 0.0147(9)       | 0.0120(10)      | -0.0006(7)      | -0.0010(7)      | -0.0060(8)      |
| P2  | 0.0127(8)       | 0.0132(9)       | 0.0104(9)       | -0.0061(7)      | 0.0023(7)       | -0.0042(8)      |
| P3  | 0.0111(8)       | 0.0118(9)       | 0.0090(9)       | -0.0038(7)      | 0.0011(7)       | -0.0035(7)      |
| P4  | 0.0129(8)       | 0.0133(9)       | 0.0126(10)      | -0.0045(7)      | 0.0012(7)       | -0.0068(8)      |

|     |            |            |            |             |             |             |
|-----|------------|------------|------------|-------------|-------------|-------------|
| O1  | 0.014(2)   | 0.013(2)   | 0.015(3)   | 0.0004(18)  | -0.0036(19) | -0.008(2)   |
| O2  | 0.032(3)   | 0.014(3)   | 0.015(3)   | 0.004(2)    | -0.013(2)   | -0.004(2)   |
| O3  | 0.017(2)   | 0.023(3)   | 0.021(3)   | -0.011(2)   | 0.008(2)    | -0.011(2)   |
| O4  | 0.041(3)   | 0.028(3)   | 0.014(3)   | -0.025(2)   | 0.012(2)    | -0.011(2)   |
| O5  | 0.014(2)   | 0.016(3)   | 0.009(2)   | -0.0088(19) | -0.0004(19) | -0.002(2)   |
| O6  | 0.017(2)   | 0.015(3)   | 0.028(3)   | -0.003(2)   | 0.004(2)    | -0.002(2)   |
| O7  | 0.0201(14) | 0.0185(15) | 0.0190(16) | -0.0072(11) | 0.0056(12)  | -0.0099(13) |
| O8  | 0.017(3)   | 0.019(3)   | 0.025(3)   | -0.003(2)   | 0.010(2)    | -0.014(3)   |
| O9  | 0.014(2)   | 0.015(3)   | 0.013(3)   | -0.0041(18) | -0.0052(19) | -0.006(2)   |
| O10 | 0.015(2)   | 0.023(3)   | 0.017(3)   | -0.0090(19) | 0.002(2)    | -0.014(2)   |
| O11 | 0.010(2)   | 0.030(3)   | 0.018(3)   | -0.008(2)   | 0.007(2)    | -0.016(2)   |
| O12 | 0.020(2)   | 0.014(3)   | 0.018(3)   | -0.0054(19) | 0.003(2)    | -0.008(2)   |
| O13 | 0.015(2)   | 0.016(3)   | 0.015(3)   | -0.0090(19) | -0.002(2)   | 0.004(2)    |
| O14 | 0.011(2)   | 0.016(3)   | 0.017(3)   | -0.003(2)   | -0.004(2)   | -0.005(2)   |
| F1  | 0.020(5)   | 0.047(7)   | 0.056(9)   | -0.014(5)   | 0.020(5)    | -0.027(6)   |

**Table S4.** Bond lengths (Å) and Band angles (degrees) of Na<sub>5.5</sub>Mn<sub>1.5</sub>(P<sub>2</sub>O<sub>7</sub>)<sub>2</sub>F<sub>0.5</sub>.

| Atom1 | Atom2             | distances | Band angles                                 | degrees    |
|-------|-------------------|-----------|---------------------------------------------|------------|
| Na1   | O2 <sup>vii</sup> | 2.372(7)  | O4-Mn1-O9                                   | 172.67(15) |
|       | O3                | 2.371(5)  | O4-Mn1-O10                                  | 87.7(2)    |
|       | O5 <sup>ii</sup>  | 2.345(5)  | O4-Mn1-O12                                  | 82.7(2)    |
|       | O7 <sup>v</sup>   | 2.496(5)  | O4-Mn1-O13                                  | 88.09(18)  |
|       | O8 <sup>v</sup>   | 2.469(5)  | O4-Mn1-O14                                  | 93.89(18)  |
|       | O8 <sup>vi</sup>  | 2.469(5)  | O9-Mn1-O10                                  | 94.51(19)  |
| Na2   | O3                | 2.248(5)  | O9-Mn1-O12                                  | 94.78(19)  |
|       | O11               | 2.260(6)  | O9-Mn1-O13                                  | 84.98(18)  |
|       | O12               | 2.381(5)  | O9-Mn1-O14                                  | 93.21(18)  |
|       | O13               | 2.237(5)  | O10-Mn1-O12                                 | 170.4(2)   |
|       | F1                | 2.447(12) | O10-Mn1-O13                                 | 89.09(15)  |
| Na3   | O3 <sup>ii</sup>  | 2.387(7)  | O10-Mn1-O14                                 | 86.54(15)  |
|       | O5                | 2.487(5)  | O12-Mn1-O13                                 | 89.29(15)  |
|       | O6                | 2.386(4)  | O12-Mn1-O14                                 | 95.37(15)  |
|       | O9 <sup>vi</sup>  | 2.583(5)  | O13-Mn1-O14                                 | 175.13(16) |
|       | O10 <sup>vi</sup> | 2.344(6)  | O2 <sup>xii</sup> -Mn2-O5 <sup>xiii</sup>   | 96.3(2)    |
|       | F1                | 2.137(9)  | O2 <sup>xii</sup> -Mn2-O10                  | 105.6(3)   |
|       | F1 <sup>ii</sup>  | 2.236(9)  | O2 <sup>xii</sup> -Mn2-O11 <sup>xiii</sup>  | 98.8(3)    |
| Na4   | O4                | 2.444(5)  | O2 <sup>xii</sup> -Mn2-F1 <sup>xiii</sup>   | 175.0(4)   |
|       | O4 <sup>x</sup>   | 2.671(4)  | O5 <sup>xiii</sup> -Mn2-O10                 | 149.9(3)   |
|       | O7 <sup>x</sup>   | 2.592(6)  | O5 <sup>xiii</sup> -Mn2-O11 <sup>xiii</sup> | 108.9(3)   |
|       | O11               | 2.428(4)  | O5 <sup>xiii</sup> -Mn2-F1 <sup>xiii</sup>  | 81.2(3)    |
|       | O12               | 2.479(6)  | O10-Mn2-O11 <sup>xiii</sup>                 | 88.1(3)    |
| Na5   | O5                | 2.673(5)  | O10-Mn2-F1 <sup>xiii</sup>                  | 75.3(3)    |
|       | O7                | 2.436(6)  | O11 <sup>xiii</sup> -Mn2-F1 <sup>xiii</sup> | 86.1(4)    |
|       | O9 <sup>xi</sup>  | 2.398(4)  | O1-P1-O2                                    | 103.6(3)   |

|     |                     |           |                             |          |
|-----|---------------------|-----------|-----------------------------|----------|
| Mn1 | O14 <sup>x</sup>    | 2.673(6)  | O1-P1-O11 <sup>xiii</sup>   | 107.1(3) |
|     | O4                  | 2.127(6)  | O1-P1-O14                   | 104.6(2) |
|     | O9                  | 2.111(6)  | O2-P1-O11 <sup>xiii</sup>   | 112.7(2) |
|     | O10                 | 2.161(4)  | O2-P1-O14                   | 112.2(3) |
|     | O12                 | 2.150(4)  | O11 <sup>xiii</sup> -P1-O14 | 115.4(3) |
|     | O13                 | 2.234(4)  | O4-P2-O5                    | 113.2(3) |
|     | O14                 | 2.193(4)  | O4-P2-O6                    | 106.3(3) |
| Na6 | O2 <sup>xii</sup>   | 2.100(13) | O4-P2-O7                    | 112.0(3) |
|     | O5 <sup>xiii</sup>  | 2.302(13) | O5-P2-O6                    | 101.8(2) |
|     | O8                  | 2.424(16) | O5-P2-O7                    | 115.0(3) |
|     | O10                 | 2.414(12) | O6-P2-O7                    | 107.4(2) |
|     | O11 <sup>xiii</sup> | 2.222(18) | O6-P3-O8                    | 107.5(3) |
|     | F1 <sup>xiii</sup>  | 2.535(15) | O6-P3-O10                   | 107.2(3) |
| Mn2 | O2 <sup>xii</sup>   | 2.328(7)  | O6-P3-O13 <sup>vi</sup>     | 104.2(2) |
|     | O5 <sup>xiii</sup>  | 2.197(7)  | O8-P3-O10                   | 110.8(3) |
|     | O8                  | 2.414(6)  | O8-P3-O13 <sup>vi</sup>     | 113.3(2) |
|     | O10                 | 2.167(9)  | O10-P3-O13 <sup>vi</sup>    | 113.2(3) |
|     | O11 <sup>xiii</sup> | 2.306(10) | O1-P4-O3 <sup>xiii</sup>    | 109.3(2) |
|     | F1 <sup>xiii</sup>  | 2.328(7)  | O1-P4-O9                    | 107.5(3) |
| P1  | O1                  | 1.630(5)  | O1-P4-O12 <sup>vii</sup>    | 101.6(3) |
|     | O2                  | 1.503(4)  |                             |          |
|     | O11 <sup>xiii</sup> | 1.509(5)  |                             |          |
|     | O14                 | 1.517(5)  |                             |          |
| P2  | O4                  | 1.514(6)  |                             |          |
|     | O5                  | 1.518(5)  |                             |          |
|     | O6                  | 1.648(4)  |                             |          |
|     | O7                  | 1.493(4)  |                             |          |
| P3  | O6                  | 1.619(5)  |                             |          |
|     | O8                  | 1.516(5)  |                             |          |
|     | O10                 | 1.522(6)  |                             |          |
|     | O13 <sup>vi</sup>   | 1.499(4)  |                             |          |
| P4  | O1                  | 1.619(4)  |                             |          |
|     | O3 <sup>xiii</sup>  | 1.499(5)  |                             |          |
|     | O9                  | 1.522(5)  |                             |          |
|     | O12 <sup>vii</sup>  | 1.520(6)  |                             |          |

Note: symmetry transformations used to generate equivalent atoms:

(i)-x+3,-y,-z+1; (ii)-x+3,-y+1,-z+1; (iii) -x+3,-y+1,-z; (iv)x,y-1,z; (v) x+1,y-1,z; (vi)-x+2,-y+1,-z+1; (vii)-x+2,-y+1,-z; (viii)x+1,y,z; (ix)-x+2,-y+2,-z+1; (x)-x+2,-y+2,-z; (xi)x,y+1,z; (xii) -x+1,-y+2,-z; (xiii)x-1,y,z;

**Table S5.** Fractional atomic coordinates and isotropic or equivalent isotropic displacement parameters of Na<sub>7</sub>Mn<sub>0.75</sub>(P<sub>2</sub>O<sub>7</sub>)<sub>2</sub>F<sub>2</sub>.

|     | Wyck. | x           | y          | z           | U <sub>iso</sub> */U <sub>eq</sub> | Occ.(<1) |
|-----|-------|-------------|------------|-------------|------------------------------------|----------|
| Na1 | 8f    | 1.08159(15) | 0.3317(4)  | 0.01714(19) | 0.0113(8)                          | 1        |
| Na2 | 4e    | 1           | -0.3636(7) | 0.25        | 0.0181(13)                         | 1        |
| Na3 | 8f    | 1.12455(16) | -0.1586(5) | 0.1400(2)   | 0.0133(9)                          | 1        |
| Na4 | 8f    | 1.27914(16) | 0.2714(5)  | 0.11931(19) | 0.0152(9)                          | 1        |
| Mn1 | 4d    | 0.75        | 0.25       | 0           | 0.0213(7)                          | 0.75     |
| P1  | 8f    | 0.93321(9)  | 0.1286(3)  | 0.10086(11) | 0.0048(5)                          | 1        |
| P2  | 8f    | 0.84004(9)  | 0.3146(3)  | 0.22726(11) | 0.0041(5)                          | 1        |
| O1  | 8f    | 0.8682(3)   | -0.4359(7) | 0.2361(3)   | 0.0087(13)                         | 1        |
| O2  | 8f    | 0.9832(3)   | -0.0884(7) | 0.1130(3)   | 0.0089(13)                         | 1        |
| O3  | 8f    | 1.1700(3)   | 0.2164(8)  | 0.1800(3)   | 0.0098(14)                         | 1        |
| O4  | 8f    | 0.7647(2)   | 0.2739(7)  | 0.1390(3)   | 0.0070(13)                         | 1        |
| O5  | 8f    | 0.9094(3)   | 0.1552(7)  | 0.2031(3)   | 0.0073(13)                         | 1        |
| O6  | 8f    | 0.9727(3)   | 0.3491(8)  | 0.0831(4)   | 0.0123(15)                         | 1        |
| O7  | 8f    | 0.8515(3)   | 0.0884(7)  | 0.0222(3)   | 0.0088(13)                         | 1        |
| F1  | 8f    | 1.1999(2)   | 0.4741(6)  | -0.0008(3)  | 0.0093(11)                         | 1        |

**Table S6.** Harmonic displacement parameters obtained for the compound Na<sub>7</sub>Mn<sub>0.75</sub>(P<sub>2</sub>O<sub>7</sub>)<sub>2</sub>F<sub>2</sub>.

|     | U <sub>11</sub> | U <sub>22</sub> | U <sub>33</sub> | U <sub>12</sub> | U <sub>13</sub> | U <sub>23</sub> |
|-----|-----------------|-----------------|-----------------|-----------------|-----------------|-----------------|
| Na1 | 0.0091(13)      | 0.0132(13)      | 0.0115(14)      | -0.0007(9)      | 0.0024(10)      | -0.0004(10)     |
| Na2 | 0.0069(18)      | 0.026(2)        | 0.022(2)        | 0               | 0.0053(16)      | 0               |
| Na3 | 0.0126(14)      | 0.0148(13)      | 0.0132(14)      | 0.0011(10)      | 0.0045(11)      | 0.0046(10)      |
| Na4 | 0.0145(14)      | 0.0227(15)      | 0.0091(14)      | 0.0086(11)      | 0.0048(11)      | 0.0068(11)      |
| Mn1 | 0.0198(11)      | 0.0216(11)      | 0.0218(12)      | -0.0009(9)      | 0.0046(9)       | 0.0005(9)       |
| P1  | 0.0044(7)       | 0.0057(7)       | 0.0044(8)       | 0.0008(5)       | 0.0016(6)       | -0.0001(5)      |
| P2  | 0.0045(7)       | 0.0053(7)       | 0.0028(8)       | 0.0000(5)       | 0.0014(6)       | 0.0004(5)       |
| O1  | 0.007(2)        | 0.005(2)        | 0.013(2)        | -0.0026(15)     | 0.0012(17)      | -0.0022(16)     |
| O2  | 0.008(2)        | 0.009(2)        | 0.009(2)        | 0.0051(16)      | 0.0018(18)      | -0.0020(17)     |
| O3  | 0.011(2)        | 0.015(2)        | 0.006(2)        | -0.0005(17)     | 0.0053(18)      | -0.0003(17)     |
| O4  | 0.004(2)        | 0.011(2)        | 0.005(2)        | 0.0000(16)      | 0.0006(17)      | -0.0011(16)     |
| O5  | 0.006(2)        | 0.013(2)        | 0.004(2)        | 0.0054(16)      | 0.0027(17)      | 0.0015(16)      |
| O6  | 0.009(2)        | 0.010(2)        | 0.018(2)        | -0.0024(16)     | 0.0032(19)      | 0.0049(18)      |
| O7  | 0.006(2)        | 0.012(2)        | 0.005(2)        | 0.0023(16)      | -0.0025(16)     | -0.0020(16)     |
| F1  | 0.0080(17)      | 0.0094(17)      | 0.0099(19)      | -0.0015(14)     | 0.0016(14)      | 0.0017(14)      |

**Table S7.** Bond lengths (Å) and Band angles (degrees) of Na<sub>7</sub>Mn<sub>0.75</sub>(P<sub>2</sub>O<sub>7</sub>)<sub>2</sub>F<sub>2</sub>.

| Atom1 | Atom2           | distances | Band angles              | degrees   |
|-------|-----------------|-----------|--------------------------|-----------|
| Na1   | O2 <sup>i</sup> | 2.332(5)  | O4-Mn1-O4 <sup>xii</sup> | 180.0(5)  |
|       | O3              | 2.468(5)  | O4-Mn1-O7                | 90.96(18) |



|     |                   |          |                                          |           |
|-----|-------------------|----------|------------------------------------------|-----------|
|     | O6                | 2.325(6) | O4-Mn1-O7 <sup>xii</sup>                 | 89.04(18) |
|     | O6 <sup>ii</sup>  | 2.349(5) | O4-Mn1-F1 <sup>vii</sup>                 | 89.65(17) |
|     | O7 <sup>i</sup>   | 2.805(5) | O4-Mn1-F1 <sup>ii</sup>                  | 90.35(17) |
|     | F1                | 2.282(5) | O4 <sup>xii</sup> -Mn1-O7                | 89.04(18) |
| Na2 | O1                | 2.268(5) | O4 <sup>xii</sup> -Mn1-O7 <sup>xii</sup> | 90.96(18) |
|     | O1 <sup>vi</sup>  | 2.268(5) | O4 <sup>xii</sup> -Mn1-F1 <sup>vii</sup> | 90.35(17) |
|     | O2                | 2.457(5) | O4 <sup>xii</sup> -Mn1-F1 <sup>ii</sup>  | 89.65(17) |
|     | O2 <sup>vi</sup>  | 2.457(5) | O7-Mn1-O7 <sup>xii</sup>                 | 180.0(5)  |
|     | O6 <sup>ix</sup>  | 2.812(5) | O7-Mn1-F1 <sup>vii</sup>                 | 89.30(17) |
|     | O6 <sup>x</sup>   | 2.812(5) | O7-Mn1-F1 <sup>ii</sup>                  | 90.70(17) |
| Na3 | O1 <sup>vi</sup>  | 2.348(5) | O7 <sup>xii</sup> -Mn1-F1 <sup>vii</sup> | 90.70(17) |
|     | O2                | 2.397(5) | O7 <sup>xii</sup> -Mn1-F1 <sup>ii</sup>  | 89.30(17) |
|     | O3                | 2.314(5) | F1 <sup>vii</sup> -Mn1-F1 <sup>ii</sup>  | 180.0(5)  |
|     | O4 <sup>xi</sup>  | 2.456(5) | O2-P1-O5                                 | 105.1(2)  |
|     | O7 <sup>i</sup>   | 2.477(6) | O2-P1-O6                                 | 116.8(3)  |
| Na4 | O1 <sup>v</sup>   | 2.255(5) | O2-P1-O7                                 | 109.6(2)  |
|     | O3                | 2.304(6) | O5-P1-O6                                 | 108.2(3)  |
|     | O7 <sup>v</sup>   | 2.784(6) | O5-P1-O7                                 | 104.2(2)  |
|     | F1                | 2.192(4) | O6-P1-O7                                 | 111.9(2)  |
|     | F1 <sup>iv</sup>  | 2.299(5) | O1 <sup>iii</sup> -P2-O3 <sup>vi</sup>   | 113.9(3)  |
| Mn1 | O4                | 1.915(4) | O1 <sup>iii</sup> -P2-O4                 | 112.9(2)  |
|     | O4 <sup>xii</sup> | 1.915(4) | O1 <sup>iii</sup> -P2-O5                 | 108.5(3)  |
|     | O7                | 1.930(4) | O3 <sup>vi</sup> -P2-O4                  | 112.0(3)  |
|     | O7 <sup>xii</sup> | 1.930(4) | O3 <sup>vi</sup> -P2-O5                  | 104.4(2)  |
|     | F1 <sup>vii</sup> | 1.808(4) | O4-P2-O5                                 | 104.3(2)  |
|     | F1 <sup>ii</sup>  | 1.808(4) |                                          |           |
| P1  | O2                | 1.501(5) |                                          |           |
|     | O5                | 1.618(5) |                                          |           |
|     | O6                | 1.497(5) |                                          |           |
|     | O7                | 1.548(4) |                                          |           |
| P2  | O1 <sup>iii</sup> | 1.512(4) |                                          |           |
|     | O3 <sup>vi</sup>  | 1.483(5) |                                          |           |
|     | O4                | 1.545(4) |                                          |           |
|     | O5                | 1.621(5) |                                          |           |

Note: symmetry transformations used to generate equivalent atoms:

(i)-x+2,-y,-z; (ii)-x+2,-y+1,-z; (iii) x,y+1,z; (iv)-x+5/2,-y+1/2,-z; (v)x+1/2,y+1/2,z; (vi)-x+2,y,-z+1/2; (vii)x-1/2,y-1/2,z; (viii)-x+5/2,y-1/2,-z+1/2; (ix)x,y-1,z; (x)-x+2,y-1,-z+1/2; (xi)x+1/2,y-1/2,z; (xii)-x+3/2,-y+1/2,-z;(xiii)x,-y,z+1/2; (xiv)-x+5/2,y+1/2,-z+1/2; (xv)x-1/2,y+1/2,z; (xvi)-x+2,y+1,-z+1/2;

**Table S8.** Fractional atomic coordinates and isotropic or equivalent isotropic displacement parameters of Na<sub>9</sub>Mn<sub>3</sub>(P<sub>2</sub>O<sub>7</sub>)<sub>4</sub>F.

| Wyck. | x | y | z | Uiso*/Ueq | Occ.<(1) |
|-------|---|---|---|-----------|----------|
|-------|---|---|---|-----------|----------|

|     |    |             |             |              |            |   |
|-----|----|-------------|-------------|--------------|------------|---|
| Na1 | 2i | 0.9031(5)   | 0.1462(3)   | 0.25826(12)  | 0.0290(11) | 1 |
| Na2 | 2i | 0.0158(4)   | 0.7965(3)   | 0.32383(12)  | 0.0195(9)  | 1 |
| Na3 | 2i | 0.5314(4)   | 0.8024(3)   | 0.31971(11)  | 0.0180(9)  | 1 |
| Na4 | 2i | -0.4107(4)  | 0.0702(3)   | 0.08875(13)  | 0.0279(10) | 1 |
| Na5 | 2i | 0.5899(3)   | 0.8843(2)   | 0.61610(11)  | 0.0141(8)  | 1 |
| Na6 | 2i | 0.0846(4)   | 0.3822(2)   | 0.11858(11)  | 0.0155(9)  | 1 |
| Na7 | 2i | 0.9502(4)   | 0.7082(2)   | 0.16989(11)  | 0.0154(9)  | 1 |
| Na8 | 2i | 0.9036(4)   | 0.4145(3)   | 0.40965(13)  | 0.0266(10) | 1 |
| Na9 | 2i | 0.4719(4)   | 0.7206(3)   | 0.17296(12)  | 0.0195(9)  | 1 |
| Mn1 | 2i | 0.76123(14) | 0.72906(9)  | 0.48452(4)   | 0.0075(3)  | 1 |
| Mn2 | 2i | 0.73743(14) | 0.77291(9)  | 1.01128(4)   | 0.0082(3)  | 1 |
| Mn3 | 2i | 0.39848(15) | 0.60519(10) | 0.75809(5)   | 0.0159(3)  | 1 |
| P1  | 2i | 0.3671(2)   | 0.53746(16) | 0.91996(8)   | 0.0081(5)  | 1 |
| P2  | 2i | 0.0550(3)   | 0.02778(16) | 0.11003(8)   | 0.0102(5)  | 1 |
| P3  | 2i | 1.2837(2)   | 0.80417(16) | 0.46904(8)   | 0.0075(5)  | 1 |
| P4  | 2i | -0.2147(2)  | 0.30198(16) | -0.02686(8)  | 0.0079(5)  | 1 |
| P5  | 2i | 0.6405(3)   | 0.96910(17) | 0.77297(8)   | 0.0123(5)  | 1 |
| P6  | 2i | 1.1341(2)   | 0.95135(16) | 0.57852(8)   | 0.0079(5)  | 1 |
| P7  | 2i | 0.5606(2)   | 0.52898(16) | 0.61161(8)   | 0.0076(5)  | 1 |
| P8  | 2i | 0.1683(3)   | 0.51085(16) | 0.26981(8)   | 0.0107(5)  | 1 |
| O1  | 2i | 0.7146(6)   | 0.5801(4)   | 0.55795(19)  | 0.0127(14) | 1 |
| O2  | 2i | 1.3208(6)   | 0.8537(4)   | 0.40104(18)  | 0.0103(14) | 1 |
| O3  | 2i | 0.2934(6)   | 0.4416(4)   | 0.22311(19)  | 0.0145(15) | 1 |
| O4  | 2i | 0.2197(6)   | 0.5610(4)   | 0.97920(18)  | 0.0101(9)  | 1 |
| O5  | 2i | 1.0542(6)   | 0.6945(4)   | 0.47589(19)  | 0.0121(14) | 1 |
| O6  | 2i | 0.3509(6)   | 0.3810(4)   | 0.91726(19)  | 0.0115(14) | 1 |
| O7  | 2i | 0.3098(6)   | 0.5499(4)   | 0.34147(19)  | 0.0169(15) | 1 |
| O8  | 2i | 0.2669(6)   | 0.5741(4)   | 0.85704(19)  | 0.0153(15) | 1 |
| O9  | 2i | -0.0315(6)  | 0.2530(4)   | 0.00641(19)  | 0.0124(14) | 1 |
| O10 | 2i | 0.8895(6)   | 0.8755(4)   | 0.55265(18)  | 0.0086(13) | 1 |
| O11 | 2i | -0.0203(6)  | 0.1413(4)   | 0.14566(19)  | 0.0166(15) | 1 |
| O12 | 2i | 0.1714(6)   | 0.6565(4)   | 0.25127(18)  | 0.0103(13) | 1 |
| O13 | 2i | 0.8308(6)   | 0.8914(4)   | 0.40666(18)  | 0.0113(14) | 1 |
| O14 | 2i | 0.4981(6)   | 0.6407(4)   | 0.65347(19)  | 0.0145(15) | 1 |
| O15 | 2i | 0.8477(6)   | 0.9005(4)   | 1.08790(18)  | 0.0121(14) | 1 |
| O16 | 2i | 0.6564(6)   | 0.5894(4)   | 0.41271(19)  | 0.0135(9)  | 1 |
| O17 | 2i | 0.6064(6)   | 0.6329(4)   | 0.93883(18)  | 0.0108(14) | 1 |
| O18 | 2i | 0.4642(6)   | 0.7493(4)   | 0.50052(18)  | 0.0099(14) | 1 |
| O19 | 2i | -0.0600(6)  | 0.4132(4)   | 0.28310(19)  | 0.0177(15) | 1 |
| O20 | 2i | 1.2106(6)   | 0.8796(4)   | 0.63383(20)  | 0.0195(16) | 1 |
| O21 | 2i | 0.8130(7)   | 1.0424(4)   | 0.83885(19)  | 0.0200(16) | 1 |
| O22 | 2i | 0.4402(6)   | 0.8097(4)   | 1.02030(19)  | 0.0124(14) | 1 |
| O23 | 2i | 1.2840(6)   | 0.9397(4)   | 0.51758(18)  | 0.0075(13) | 1 |
| O24 | 2i | 0.5104(7)   | 0.8224(4)   | 0.7901(2)    | 0.0226(16) | 1 |
| O25 | 2i | -0.1757(6)  | 0.3499(4)   | -0.09476(18) | 0.0114(14) | 1 |

|     |    |           |           |             |            |   |
|-----|----|-----------|-----------|-------------|------------|---|
| O26 | 2i | 0.2094(6) | 0.0704(4) | 0.05508(19) | 0.0118(14) | 1 |
| O27 | 2i | 0.4916(6) | 1.0623(4) | 0.7691(2)   | 0.0230(16) | 1 |
| O28 | 2i | 0.7937(6) | 0.9739(4) | 0.7172(2)   | 0.0204(16) | 1 |
| F1  | 2i | 0.7141(5) | 0.6858(4) | 0.25136(17) | 0.0338(16) | 1 |

**Table S9.** Harmonic displacement parameters obtained for the compound Na<sub>9</sub>Mn<sub>3</sub>(P<sub>2</sub>O<sub>7</sub>)<sub>4</sub>F.

|     | U <sub>11</sub> | U <sub>22</sub> | U <sub>33</sub> | U <sub>12</sub> | U <sub>13</sub> | U <sub>23</sub> |
|-----|-----------------|-----------------|-----------------|-----------------|-----------------|-----------------|
| Na1 | 0.0436(18)      | 0.0339(17)      | 0.0146(15)      | 0.0182(14)      | 0.0085(13)      | 0.0046(13)      |
| Na2 | 0.0153(14)      | 0.0282(15)      | 0.0151(14)      | 0.0097(11)      | -0.0047(11)     | -0.0098(11)     |
| Na3 | 0.0136(13)      | 0.0280(15)      | 0.0123(13)      | 0.0066(11)      | 0.0030(11)      | -0.0020(11)     |
| Na4 | 0.0123(14)      | 0.0429(17)      | 0.0321(17)      | 0.0099(12)      | 0.0045(12)      | 0.0196(14)      |
| Na5 | 0.0111(13)      | 0.0166(13)      | 0.0144(13)      | 0.0047(10)      | 0.0005(10)      | -0.0030(10)     |
| Na6 | 0.0145(13)      | 0.0189(13)      | 0.0130(13)      | 0.0060(11)      | 0.0000(11)      | -0.0033(11)     |
| Na7 | 0.0152(13)      | 0.0230(14)      | 0.0085(13)      | 0.0068(11)      | -0.0007(10)     | 0.0006(11)      |
| Na8 | 0.0149(14)      | 0.0439(18)      | 0.0274(16)      | 0.0142(12)      | 0.0052(12)      | 0.0209(14)      |
| Na9 | 0.0143(13)      | 0.0313(15)      | 0.0136(14)      | 0.0101(11)      | -0.0035(11)     | -0.0066(12)     |
| Mn1 | 0.0055(5)       | 0.0084(5)       | 0.0075(5)       | 0.0005(4)       | 0.0002(4)       | -0.0007(4)      |
| Mn2 | 0.0067(5)       | 0.0080(5)       | 0.0086(5)       | 0.0005(4)       | -0.0004(4)      | -0.0004(4)      |
| Mn3 | 0.0133(5)       | 0.0231(6)       | 0.0123(5)       | 0.0067(4)       | 0.0019(4)       | 0.0018(4)       |
| P1  | 0.0058(8)       | 0.0111(8)       | 0.0064(8)       | 0.0010(6)       | 0.0001(6)       | -0.0006(6)      |
| P2  | 0.0125(9)       | 0.0075(8)       | 0.0082(8)       | 0.0001(7)       | -0.0011(7)      | -0.0007(6)      |
| P3  | 0.0053(8)       | 0.0086(8)       | 0.0076(8)       | 0.0010(6)       | 0.0001(6)       | -0.0012(6)      |
| P4  | 0.0075(8)       | 0.0083(8)       | 0.0064(8)       | 0.0005(6)       | 0.0005(7)       | -0.0001(6)      |
| P5  | 0.0157(9)       | 0.0115(8)       | 0.0073(8)       | 0.0011(7)       | -0.0022(7)      | 0.0004(6)       |
| P6  | 0.0076(8)       | 0.0082(8)       | 0.0072(8)       | 0.0016(6)       | 0.0012(6)       | -0.0007(6)      |
| P7  | 0.0074(8)       | 0.0085(8)       | 0.0057(8)       | 0.0003(6)       | -0.0001(6)      | 0.0017(6)       |
| P8  | 0.0091(8)       | 0.0133(8)       | 0.0091(8)       | 0.0033(7)       | -0.0018(7)      | -0.0008(7)      |
| O1  | 0.015(2)        | 0.011(2)        | 0.011(2)        | 0.0012(18)      | 0.0051(18)      | 0.0058(18)      |
| O2  | 0.012(2)        | 0.014(2)        | 0.005(2)        | 0.0054(18)      | -0.0009(17)     | 0.0002(17)      |
| O3  | 0.012(2)        | 0.022(2)        | 0.012(2)        | 0.0108(18)      | -0.0015(18)     | -0.0048(19)     |
| O5  | 0.010(2)        | 0.008(2)        | 0.017(2)        | 0.0002(17)      | 0.0033(18)      | -0.0025(18)     |
| O6  | 0.013(2)        | 0.006(2)        | 0.013(2)        | 0.0002(17)      | -0.0026(18)     | -0.0043(17)     |
| O7  | 0.024(2)        | 0.020(2)        | 0.011(2)        | 0.0138(20)      | -0.0075(19)     | 0.0002(19)      |
| O8  | 0.009(2)        | 0.029(3)        | 0.009(2)        | 0.0067(19)      | -0.0005(18)     | 0.0027(19)      |
| O9  | 0.010(2)        | 0.015(2)        | 0.012(2)        | 0.0043(18)      | -0.0035(18)     | 0.0040(18)      |
| O10 | 0.006(2)        | 0.012(2)        | 0.005(2)        | 0.0000(17)      | -0.0001(16)     | -0.0052(17)     |
| O11 | 0.027(3)        | 0.009(2)        | 0.015(2)        | 0.0059(19)      | 0.003(2)        | 0.0000(18)      |
| O12 | 0.012(2)        | 0.011(2)        | 0.010(2)        | 0.0054(17)      | 0.0012(17)      | 0.0049(17)      |
| O13 | 0.010(2)        | 0.011(2)        | 0.012(2)        | 0.0024(17)      | 0.0002(17)      | -0.0040(17)     |
| O14 | 0.015(2)        | 0.012(2)        | 0.015(2)        | 0.0021(18)      | 0.0019(19)      | -0.0027(18)     |
| O15 | 0.010(2)        | 0.012(2)        | 0.008(2)        | -0.0060(17)     | 0.0030(17)      | -0.0034(17)     |

|     |          |          |          |             |             |             |
|-----|----------|----------|----------|-------------|-------------|-------------|
| O17 | 0.006(2) | 0.014(2) | 0.009(2) | -0.0015(17) | -0.0013(17) | -0.0037(18) |
| O18 | 0.008(2) | 0.014(2) | 0.009(2) | 0.0055(17)  | -0.0003(17) | 0.0024(17)  |
| O19 | 0.013(2) | 0.018(2) | 0.020(2) | 0.0010(18)  | -0.0009(19) | 0.0074(19)  |
| O20 | 0.016(2) | 0.031(3) | 0.014(2) | 0.011(2)    | 0.0012(19)  | 0.005(2)    |
| O21 | 0.031(3) | 0.012(2) | 0.014(2) | 0.004(2)    | -0.013(2)   | -0.0032(19) |
| O22 | 0.009(2) | 0.009(2) | 0.015(2) | -0.0031(17) | -0.0006(18) | -0.0011(18) |
| O23 | 0.008(2) | 0.007(2) | 0.005(2) | -0.0022(16) | 0.0045(16)  | -0.0035(16) |
| O24 | 0.029(3) | 0.011(2) | 0.022(3) | -0.0048(19) | 0.008(2)    | 0.0029(19)  |
| O25 | 0.011(2) | 0.018(2) | 0.004(2) | 0.0031(18)  | 0.0003(17)  | 0.0035(17)  |
| O26 | 0.010(2) | 0.014(2) | 0.011(2) | 0.0039(18)  | 0.0059(18)  | 0.0023(18)  |
| O27 | 0.018(2) | 0.025(3) | 0.027(3) | 0.009(2)    | -0.006(2)   | -0.001(2)   |
| O28 | 0.019(2) | 0.026(3) | 0.012(2) | 0.001(2)    | 0.0044(19)  | 0.0011(19)  |
| F1  | 0.014(2) | 0.072(3) | 0.017(2) | 0.019(2)    | -0.0008(16) | -0.006(2)   |

**Table S10.** Bond lengths (Å) and Band angles (degrees) of Na<sub>9</sub>Mn<sub>3</sub>(P<sub>2</sub>O<sub>7</sub>)<sub>4</sub>F.

| Atom1 | Atom2                 | distances | Band angles                                  | degrees    |
|-------|-----------------------|-----------|----------------------------------------------|------------|
| Na1   | O11 <sup>^iii^</sup>  | 2.334(5)  | O1-Mn1-O5                                    | 84.72(16)  |
|       | O19 <sup>^iii^</sup>  | 2.592(5)  | O1-Mn1-O10                                   | 88.62(15)  |
|       | O20 <sup>^v^</sup>    | 2.318(5)  | O1-Mn1-O13                                   | 177.02(14) |
|       | O24 <sup>^iv^</sup>   | 2.845(5)  | O1-Mn1-O16                                   | 94.31(15)  |
|       | O27 <sup>^iv^</sup>   | 2.716(4)  | O1-Mn1-O18                                   | 89.24(16)  |
|       | O28 <sup>^v^</sup>    | 2.574(6)  | O5-Mn1-O10                                   | 90.26(16)  |
| Na2   | O2 <sup>^vi^</sup>    | 2.321(4)  | O5-Mn1-O13                                   | 92.56(15)  |
|       | O12                   | 2.380(5)  | O5-Mn1-O16                                   | 85.97(16)  |
|       | O13 <sup>^vi^</sup>   | 2.370(5)  | O5-Mn1-O18                                   | 173.96(16) |
|       | O28 <sup>^vii^</sup>  | 2.441(5)  | O10-Mn1-O13                                  | 90.18(14)  |
|       | F1 <sup>^vi^</sup>    | 2.287(4)  | O10-Mn1-O16                                  | 174.99(16) |
| Na3   | O2 <sup>^vi^</sup>    | 2.271(5)  | O10-Mn1-O18                                  | 89.45(16)  |
|       | O7                    | 2.543(4)  | O13-Mn1-O16                                  | 86.69(15)  |
|       | O12                   | 2.572(4)  | O13-Mn1-O18                                  | 93.47(15)  |
|       | O13                   | 2.429(4)  | O16-Mn1-O18                                  | 94.64(16)  |
|       | O27 <sup>^vii^</sup>  | 2.323(5)  | O6 <sup>^xix^</sup> -Mn2-O9 <sup>^iv^</sup>  | 96.54(16)  |
|       | F1                    | 2.291(5)  | O6 <sup>^xix^</sup> -Mn2-O15                 | 83.38(15)  |
| Na4   | O11                   | 2.538(4)  | O6 <sup>^xix^</sup> -Mn2-O17                 | 91.90(15)  |
|       | O15 <sup>^xiii^</sup> | 2.660(5)  | O6 <sup>^xix^</sup> -Mn2-O22                 | 89.24(16)  |
|       | O22 <sup>^xiii^</sup> | 2.718(4)  | O6 <sup>^xix^</sup> -Mn2-O26 <sup>^iv^</sup> | 173.21(17) |
|       | O22 <sup>^viii^</sup> | 2.584(5)  | O9 <sup>^iv^</sup> -Mn2-O15                  | 94.42(16)  |
|       | O24 <sup>^viii^</sup> | 2.765(5)  | O9 <sup>^iv^</sup> -Mn2-O17                  | 88.51(16)  |
| Na5   | O26 <sup>^vi^</sup>   | 2.453(5)  | O9 <sup>^iv^</sup> -Mn2-O22                  | 173.97(17) |
|       | O2 <sup>^ix^</sup>    | 2.529(4)  | O9 <sup>^iv^</sup> -Mn2-O26 <sup>^iv^</sup>  | 90.17(16)  |
|       | O10                   | 2.337(4)  | O15-Mn2-O17                                  | 174.69(15) |
|       | O14                   | 2.475(4)  | O15-Mn2-O22                                  | 87.94(16)  |
|       | O18                   | 2.572(4)  | O15-Mn2-O26 <sup>^iv^</sup>                  | 95.07(15)  |
|       | O20 <sup>^vi^</sup>   | 2.411(5)  | O17-Mn2-O22                                  | 89.57(16)  |

|     |                     |          |                                            |            |
|-----|---------------------|----------|--------------------------------------------|------------|
| Na6 | O28                 | 2.329(4) | O17-Mn2-O26 <sup>iv</sup>                  | 89.33(15)  |
|     | O3                  | 2.372(4) | O22-Mn2-O26 <sup>iv</sup>                  | 84.09(16)  |
|     | O8 <sup>viii</sup>  | 2.436(5) | O3 <sup>iv</sup> -Mn3-O8                   | 98.88(15)  |
|     | O9                  | 2.486(4) | O3 <sup>iv</sup> -Mn3-O14                  | 87.27(15)  |
|     | O11                 | 2.378(4) | O3 <sup>iv</sup> -Mn3-O19 <sup>viii</sup>  | 160.66(15) |
|     | O17 <sup>iv</sup>   | 2.336(5) | O3 <sup>iv</sup> -Mn3-O24                  | 98.06(16)  |
| Na7 | O25 <sup>xiv</sup>  | 2.616(4) | O8-Mn3-O14                                 | 173.83(16) |
|     | O6 <sup>iv</sup>    | 2.438(4) | O8-Mn3-O19 <sup>viii</sup>                 | 89.02(15)  |
|     | O8 <sup>iv</sup>    | 2.720(4) | O8-Mn3-O24                                 | 85.83(15)  |
|     | O12 <sup>iii</sup>  | 2.282(5) | O14-Mn3-O19 <sup>viii</sup>                | 84.98(15)  |
|     | O15 <sup>xv</sup>   | 2.789(5) | O14-Mn3-O24                                | 93.81(15)  |
|     | O21 <sup>ix</sup>   | 2.490(4) | O19 <sup>viii</sup> -Mn3-O24               | 100.11(16) |
| Na8 | O25 <sup>xvii</sup> | 2.274(5) | O4-P1-O6                                   | 105.2(2)   |
|     | F1                  | 2.233(4) | O4-P1-O8                                   | 107.6(2)   |
|     | O1 <sup>v</sup>     | 2.442(5) | O4-P1-O17                                  | 106.8(2)   |
|     | O5 <sup>v</sup>     | 2.638(5) | O6-P1-O8                                   | 111.6(2)   |
|     | O14 <sup>iv</sup>   | 2.663(4) | O6-P1-O17                                  | 111.8(2)   |
|     | O16                 | 2.646(5) | O8-P1-O17                                  | 113.3(2)   |
| Na9 | O19 <sup>iii</sup>  | 2.563(5) | O11-P2-O15 <sup>xiii</sup>                 | 108.6(2)   |
|     | O6 <sup>iv</sup>    | 2.477(5) | O11-P2-O21 <sup>iv</sup>                   | 110.9(2)   |
|     | O12                 | 2.471(4) | O11-P2-O26                                 | 117.5(2)   |
|     | O25 <sup>xiv</sup>  | 2.292(4) | O15 <sup>xiii</sup> -P2-O21 <sup>iv</sup>  | 101.3(2)   |
|     | O27 <sup>vii</sup>  | 2.318(5) | O15 <sup>xiii</sup> -P2-O26                | 112.7(2)   |
|     | F1                  | 2.257(4) | O21 <sup>iv</sup> -P2-O26                  | 104.6(2)   |
| Mn1 | O1                  | 2.118(4) | O2-P3-O5                                   | 114.6(2)   |
|     | O5                  | 1.982(4) | O2-P3-O18 <sup>iii</sup>                   | 116.2(2)   |
|     | O10                 | 1.890(3) | O2-P3-O23                                  | 106.9(2)   |
|     | O13                 | 2.274(4) | O5-P3-O18 <sup>iii</sup>                   | 108.5(2)   |
|     | O16                 | 1.881(4) | O5-P3-O23                                  | 104.7(2)   |
|     | O18                 | 1.972(4) | O18 <sup>iii</sup> -P3-O23                 | 104.8(2)   |
| Mn2 | O6 <sup>xix</sup>   | 2.127(4) | O4 <sup>viii</sup> -P4-O9                  | 104.0(2)   |
|     | O9 <sup>iv</sup>    | 1.983(4) | O4 <sup>viii</sup> -P4-O22 <sup>viii</sup> | 105.1(2)   |
|     | O15                 | 1.892(3) | O4 <sup>viii</sup> -P4-O25                 | 106.8(2)   |
|     | O17                 | 1.916(3) | O9-P4-O22 <sup>viii</sup>                  | 108.8(2)   |
|     | O22                 | 2.019(4) | O9-P4-O25                                  | 116.1(2)   |
|     | O26 <sup>iv</sup>   | 2.069(4) | O22 <sup>viii</sup> -P4-O25                | 114.9(2)   |
| Mn3 | O3 <sup>iv</sup>    | 2.144(4) | O21-P5-O24                                 | 106.2(2)   |
|     | O8                  | 2.191(4) | O21-P5-O27                                 | 103.1(2)   |
|     | O14                 | 2.238(4) | O21-P5-O28                                 | 103.6(2)   |
|     | O19 <sup>viii</sup> | 2.200(4) | O24-P5-O27                                 | 110.6(2)   |
|     | O24                 | 2.096(4) | O24-P5-O28                                 | 115.4(3)   |
|     | P1                  | O4       | 1.586(4)                                   | O27-P5-O28 |
| O6  |                     | 1.516(4) | O10-P6-O13 <sup>ix</sup>                   | 110.2(2)   |
| O8  |                     | 1.501(4) | O10-P6-O20                                 | 112.7(2)   |
| O17 |                     | 1.533(3) | O10-P6-O23                                 | 106.20(19) |

|    |                     |          |                                        |          |
|----|---------------------|----------|----------------------------------------|----------|
| P2 | O11                 | 1.495(5) | O13 <sup>ix</sup> -P6-O20              | 115.0(2) |
|    | O15 <sup>xiii</sup> | 1.541(3) | O13 <sup>ix</sup> -P6-O23              | 105.4(2) |
|    | O21 <sup>iv</sup>   | 1.608(5) | O20-P6-O23                             | 106.5(2) |
|    | O26                 | 1.498(4) | O1-P7-O7 <sup>iv</sup>                 | 104.7(2) |
| P3 | O2                  | 1.485(4) | O1-P7-O14                              | 116.4(2) |
|    | O5                  | 1.540(3) | O1-P7-O16 <sup>iv</sup>                | 114.3(2) |
|    | O18 <sup>iii</sup>  | 1.526(4) | O7 <sup>iv</sup> -P7-O14               | 109.1(2) |
|    | O23                 | 1.605(4) | O7 <sup>iv</sup> -P7-O16 <sup>iv</sup> | 103.4(2) |
| P4 | O4 <sup>viii</sup>  | 1.616(4) | O14-P7-O16 <sup>iv</sup>               | 108.0(2) |
|    | O9                  | 1.521(4) | O3-P8-O7                               | 107.9(2) |
|    | O22 <sup>viii</sup> | 1.530(3) | O3-P8-O12                              | 112.6(2) |
|    | O25                 | 1.479(4) | O3-P8-O19                              | 113.1(2) |
| P5 | O21                 | 1.654(4) | O7-P8-O12                              | 100.9(2) |
|    | O24                 | 1.505(4) | O7-P8-O19                              | 106.1(2) |
|    | O27                 | 1.499(5) | O12-P8-O19                             | 115.0(2) |
|    | O28                 | 1.501(4) |                                        |          |
| P6 | O10                 | 1.545(3) |                                        |          |
|    | O13 <sup>ix</sup>   | 1.510(4) |                                        |          |
|    | O20                 | 1.493(5) |                                        |          |
|    | O23                 | 1.595(4) |                                        |          |
| P7 | O1                  | 1.490(4) |                                        |          |
|    | O7 <sup>iv</sup>    | 1.602(5) |                                        |          |
|    | O14                 | 1.500(4) |                                        |          |
|    | O16 <sup>iv</sup>   | 1.544(3) |                                        |          |
| P8 | O3                  | 1.506(4) |                                        |          |
|    | O7                  | 1.621(4) |                                        |          |
|    | O12                 | 1.504(4) |                                        |          |
|    | O19                 | 1.516(4) |                                        |          |

Note: symmetry transformations used to generate equivalent atoms:

(i)x+1,y-1,z; (ii)x,y-1,z; (iii)x+1,y,z; (iv)-x+1,-y+1,-z+1; (v)-x+2,-y+1,-z+1; (vi)x-1,y,z;  
(vii)-x+1,-y+2,-z+1; (viii)-x,-y+1,-z+1; (ix)-x+2,-y+2,-z+1; (x) -x-1,-y,-z; (xi)x-2,y-1,z;  
(xii)x-1,y-1,z; (xiii)x-1,y-1,z-1; (xiv)-x,-y+1,-z; (xv)x,y,z-1; (xvi)x+1,y+1,z; (xvii)-x+1,-  
y+1,-z; (xviii) x+1,y+1,z+1; (xix)-x+1,-y+1,-z+2; (xx)x-1,y+1,z;

**Table S11.** Geometrical Parameters Associated with the M- O••O -M Super Supperexchange Paths of Na<sub>9</sub>Mn<sub>3</sub>(P<sub>2</sub>O<sub>7</sub>)<sub>4</sub>F.

|                     | Mn1-<br>Mn1    | Mn1-<br>Mn1    | Mn1-<br>Mn3 | Mn1-<br>Mn3 | Mn1-<br>Mn1×2  | Mn2-<br>Mn2      | Mn2-<br>Mn2      | Mn2-<br>Mn3 | Mn2-<br>Mn3 | Mn2-<br>Mn2×2    | Mn3-<br>Mn3×2 |
|---------------------|----------------|----------------|-------------|-------------|----------------|------------------|------------------|-------------|-------------|------------------|---------------|
| <M-O••O(°)          | 151.1(2)       | 107.9(2)       | 162.7(2)    | 112.3(1)    | 153.9(2)       | 104.9(2)         | 140.5(2)         | 136.8(2)    | 149.2(2)    | 151.5(2)         | 129.2(2)      |
| <O••O-M(°)          | 113.6(2)       | 126.5(2)       | 106.8(2)    | 147.2(2)    | 153.8(2)       | 130.0(2)         | 126.4(2)         | 105.7(2)    | 116.0(2)    | 150.2(2)         | 135.8(2)      |
| M••M(Å)             | 5.278(1)       | 4.826(1)       | 5.588(1)    | 6.097(1)    | 6.281(1)       | 4.770(1)         | 5.304(1)         | 5.391(1)    | 6.068(1)    | 6.281(1)         | 6.281(1)      |
| O••O(Å)             | 2.505(5)       | 2.548(5)       | 2.462(5)    | 2.504(6)    | 2.489(5)       | 2.530(5)         | 2.524(5)         | 2.535(5)    | 2.495(6)    | 2.480(5)         | 2.511(5)      |
| torsion<br>angle(°) | ±36.9(5)       | ±70.3(3)       | 160.2(7)    | -164.0(3)   | ±166.3(3)      | ±70.0(3)         | ±16.6(5)         | 116.0(3)    | -153.4(3)   | ±167.9(3)        | ±155.2(2)     |
| Exchange<br>type    | J <sub>2</sub> | J <sub>3</sub> | -           | -           | J <sub>1</sub> | J <sub>3</sub> ' | J <sub>2</sub> ' | -           |             | J <sub>1</sub> ' | -             |

**References:**

- 1 T. Zhu, B. Zhu, O. Mentré, S. Lee, D. Chen, Y. Jin, W. Zhu, A. M. Arevalo-Lopez, C. Minaud and K.-Y. Choi, *Chem. Mater.*, 2023, **35**, 3951-3959.
